# Supplementary material for: Novel excited-state nanothermometry combining the red-shift of charge-transfer bands and a thermal coupling effect
Source: Royal Society of Chemistry journal article supplement (doi:10.1039/d0qi00965b), 2020-01-01
Supplement: d0qi00965b1.pdf [file d0qi00965b1.pdf]

## **Electronic Supplementary Information**

### **A novel excited state nanothermometry combining red-shift of charge transfer band and thermally coupled effect**

Mochen Jia, Fang Lin, Zhen Sun and Zuoling Fu\*

Coherent Light and Atomic and Molecular Spectroscopy Laboratory, Key Laboratory of Physics and Technology for Advanced Batteries, College of Physics, Jilin University, Changchun 130012, China.

E-mail address: zlfu@jlu.edu.cn

|                                                                                                                                                                                                                                                              |   |
|--------------------------------------------------------------------------------------------------------------------------------------------------------------------------------------------------------------------------------------------------------------|---|
| Experiment .....                                                                                                                                                                                                                                             | 3 |
| Characterization .....                                                                                                                                                                                                                                       | 3 |
| Fig. S1. Fourier transform infrared spectrum of YVO <sub>4</sub> : 3%Er <sup>3+</sup> , 15%Yb <sup>3+</sup> nanoparticles .....                                                                                                                              | 4 |
| Fig. S2. Emission spectra of YVO <sub>4</sub> : xEr <sup>3+</sup> , 15%Yb <sup>3+</sup> nanoparticles under the 320 nm excitation .....                                                                                                                      | 4 |
| Fig. S3. Emission spectra of YVO <sub>4</sub> : 3%Er <sup>3+</sup> , 15%Yb <sup>3+</sup> and YVO <sub>4</sub> : 15%Yb <sup>3+</sup> nanoparticles under the 320 nm excitation.....                                                                           | 5 |
| Fig. S4. Temperature evolution emission spectra under the excitation of 320 or 980 nm in the 373–573 K range of YVO <sub>4</sub> : 3%Er <sup>3+</sup> , 15%Yb <sup>3+</sup> nanoparticles .....                                                              | 5 |
| Fig. S5. Calibration curves based on thermally coupled thermometry of YVO <sub>4</sub> : 3%Er <sup>3+</sup> , 15%Yb <sup>3+</sup> nanoparticles under the excitation of 320 or 980 nm.....                                                                   | 6 |
| Fig. S6. $S_r$ based on thermally coupled thermometry of YVO <sub>4</sub> : 3%Er <sup>3+</sup> , 15%Yb <sup>3+</sup> nanoparticles under the excitation of 320 or 980 nm.....                                                                                | 6 |
| Fig. S7. Calibration curve and $S_r$ based on <i>EIR</i> of entire 320 nm peak for YVO <sub>4</sub> : 3%Er <sup>3+</sup> , 15%Yb <sup>3+</sup> nanoparticles .....                                                                                           | 7 |
| Fig. S8. Temperature cycling between 393 and 473 K based on thermally coupled thermometry of Er <sup>3+</sup> under the excitation of 980 nm.....                                                                                                            | 7 |
| Fig. S9. Temperature uncertainty $\delta T$ (50 measurements at 373 K) based on thermally coupled thermometry under the excitation of 980 nm .....                                                                                                           | 8 |
| Fig. S10. (a) Scheme of temperature detection using a constant temperature heating plate. The sample is coated on the plate. (b) Temperature measurements based on the proposed <i>EIR</i> thermometry and typical <i>LIR</i> thermometry based on TCLs..... | 8 |
| Table S1. Fitting parameters of the calibration curve based on the proposed <i>EIR</i> thermometry .....                                                                                                                                                     | 9 |
| Table S2. Comparison of the thermometric performance of proposed <i>EIR</i> thermometry and typical <i>LIR</i> thermometry based on TCLs of Er <sup>3+</sup> .....                                                                                           | 9 |

## Experiment

Chemicals: Ln(NO<sub>3</sub>)<sub>3</sub> stock solutions were prepared by dissolving Y<sub>2</sub>O<sub>3</sub> (99.99%,

Aladdin),  $\text{Er}_2\text{O}_3$  (99.99%, Aladdin) and  $\text{Yb}_2\text{O}_3$  (99.99%, Aladdin) into hot nitric acid (AR, Beijing Chemical Works) in stoichiometric proportions.  $\text{Na}_3\text{VO}_4$  (AR) and  $\text{NaOH}$  (AR) were purchased from Beijing HWRK Chem Co., LTD. The above reagents were used directly without further purification. Deionized water (12  $\text{M}\Omega\cdot\text{cm}$ ) was employed to dissolve the reagents and prepare the diluent of  $\text{NaOH}$ .

Synthesis of  $\text{Er}^{3+}/\text{Yb}^{3+}$  doped  $\text{YVO}_4$  nanoparticles by the hydrothermal method with further calcination. Taking 2 mmol of  $\text{YVO}_4$ : 3% $\text{Er}^{3+}$ , 15% $\text{Yb}^{3+}$  nanoparticles as an example, 16.4 mL of  $\text{Y}(\text{NO}_3)_3$  (0.1 M), 1.2 mL of  $\text{Er}(\text{NO}_3)_3$  (0.05 M) and 3.0 mL of  $\text{Yb}(\text{NO}_3)_3$  (0.1 M) were mixed and stirred. 2 mmol of  $\text{Na}_3\text{VO}_4$  dissolved in 20 mL of deionized water was dropped into the above lanthanide nitric acid mixture with stirring, and then the pH of the mixture was adjusted to 10 with  $\text{NaOH}$  aqueous solution (1 M and 5 M). After stirring for 1 h, the mixture was poured and sealed into a Teflon-lined autoclave and kept at 200 °C for 16 h. The precipitates were obtained by centrifugation, washed with deionized water and ethanol, and dried at 70 °C for 10 h. The final product was obtained after calcination at 600 °C for 2 h.

### **Characterization**

The crystalline structures of all samples were determined by X-ray diffraction patterns on a Bruker D8 Focus diffractometer equipped with  $\text{Cu K}\alpha$  radiation ( $\lambda = 0.15405$  nm). The morphology was obtained by a transmission electron microscope (TEM, JEM-2200FS). The Fourier transform infrared spectrum was collected by a Bruker TENSOR 27 FT-IR spectrometer. The excitation and emission spectra were recorded by an Andor SR-500i spectrometer (Andor Technology Co, Belfast, U.K.) equipped with a SR830 DSP lock-in amplifier and a CCD detector under the excitation of a xenon lamp and 980 nm diode laser. The temperature evolution experiments were carried out using a copper-constant thermocouple and temperature control system (TAP-02, orient-KOJI).

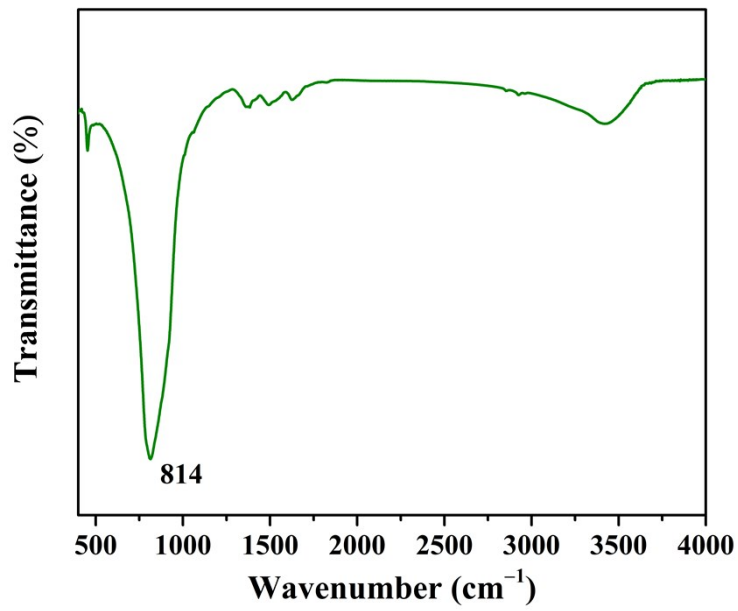

Fig. S1. Fourier transform infrared spectrum of  $\text{YVO}_4: 3\%\text{Er}^{3+}, 15\%\text{Yb}^{3+}$  nanoparticles.

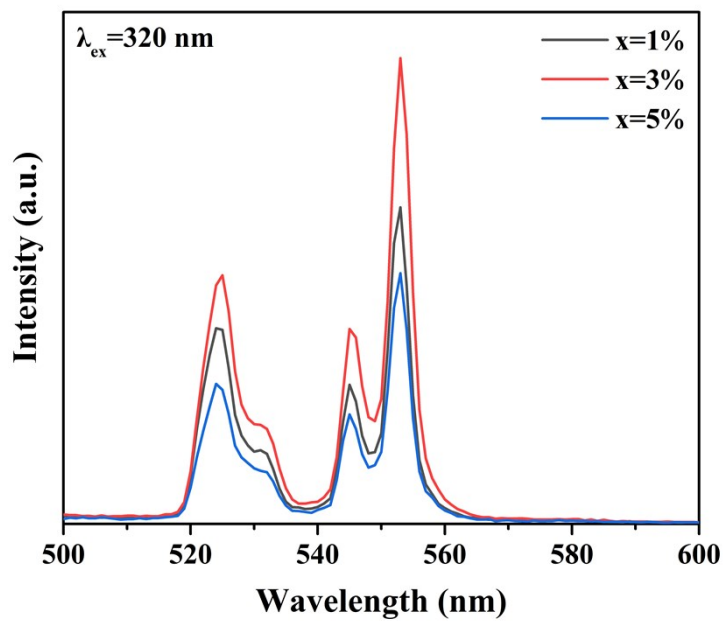

Fig. S2. Emission spectra of  $\text{YVO}_4: x\text{Er}^{3+}, 15\%\text{Yb}^{3+}$  nanoparticles under the 320 nm excitation.

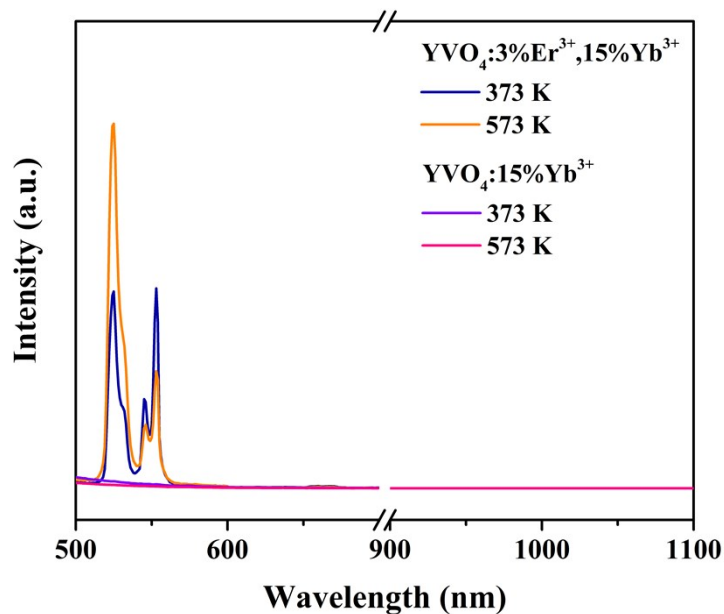

Fig. S3. Emission spectra of  $\text{YVO}_4: 3\%\text{Er}^{3+}, 15\%\text{Yb}^{3+}$  and  $\text{YVO}_4: 15\%\text{Yb}^{3+}$  nanoparticles under the 320 nm excitation.

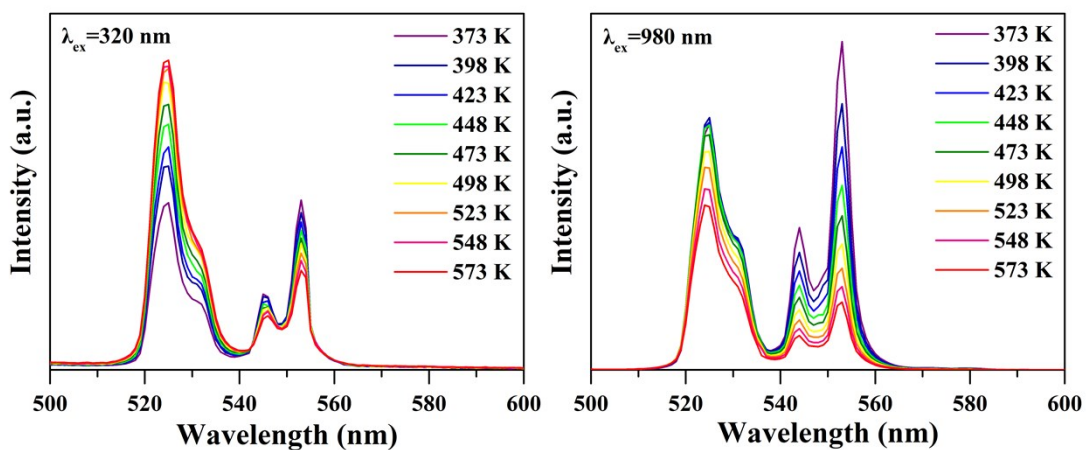

Fig. S4. Temperature evolution emission spectra under the excitation of 320 or 980 nm in the 373–573 K range of  $\text{YVO}_4: 3\%\text{Er}^{3+}, 15\%\text{Yb}^{3+}$  nanoparticles.

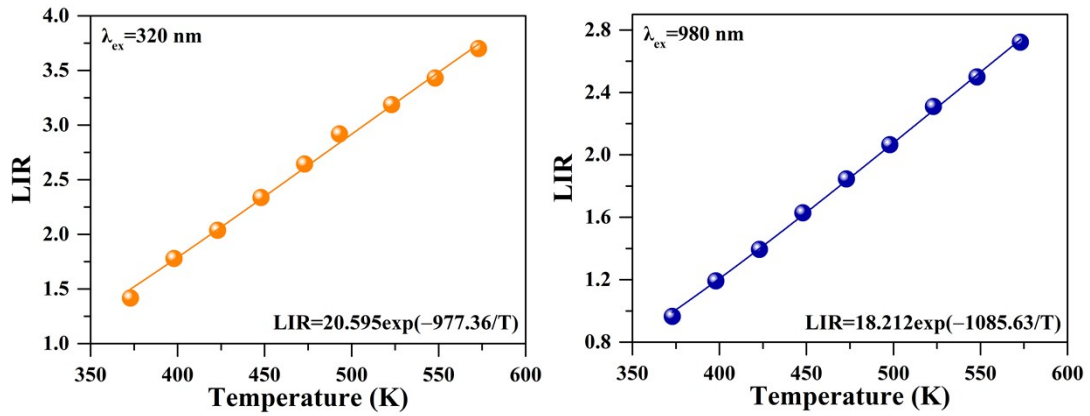

Fig. S5. Calibration curves based on thermally coupled thermometry of  $\text{YVO}_4: 3\% \text{Er}^{3+}, 15\% \text{Yb}^{3+}$  nanoparticles under the excitation of 320 or 980 nm.

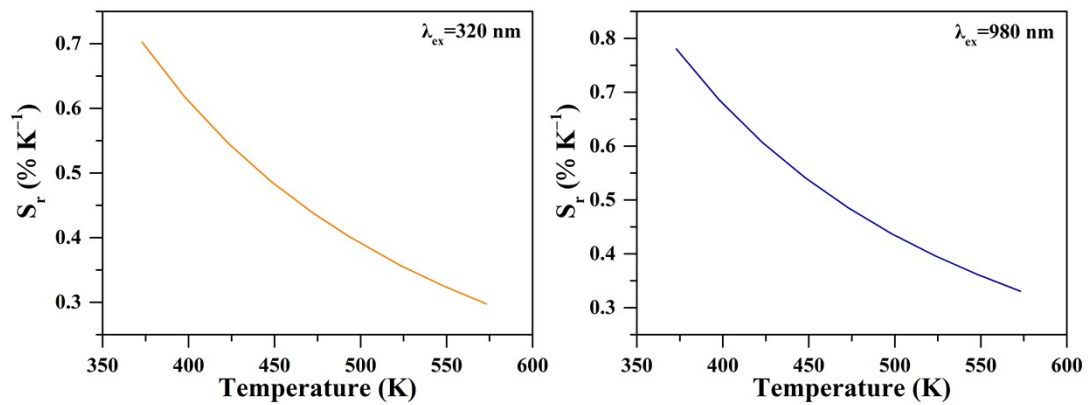

Fig. S6.  $S_r$  based on thermally coupled thermometry of  $\text{YVO}_4: 3\% \text{Er}^{3+}, 15\% \text{Yb}^{3+}$  nanoparticles under the excitation of 320 or 980 nm.

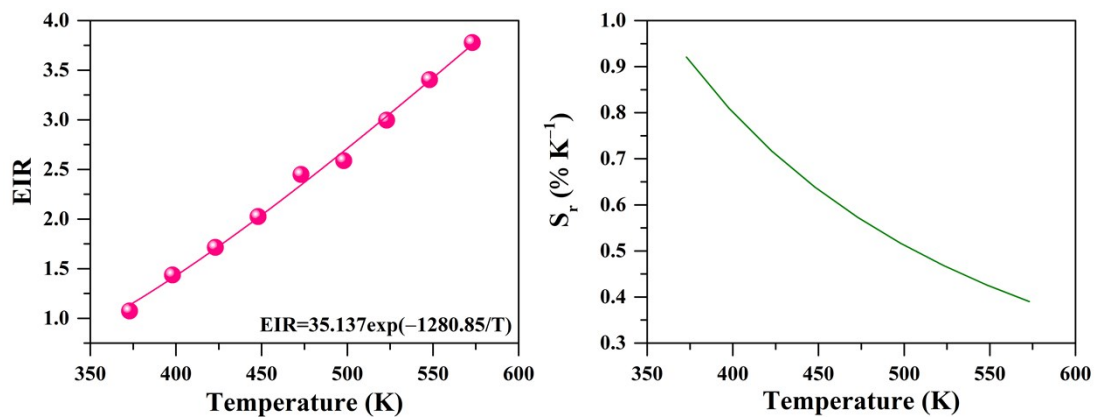

Fig. S7. Calibration curve and  $S_r$  based on  $EIR$  of entire 320 nm peak for  $YVO_4: 3\%Er^{3+}, 15\%Yb^{3+}$  nanoparticles.

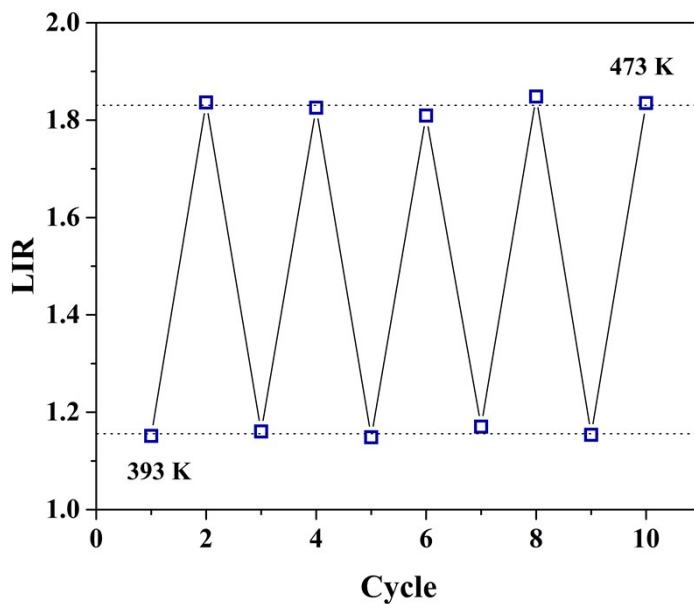

Fig. S8. Temperature cycling between 393 and 473 K based on thermally coupled thermometry of  $Er^{3+}$  under the excitation of 980 nm.

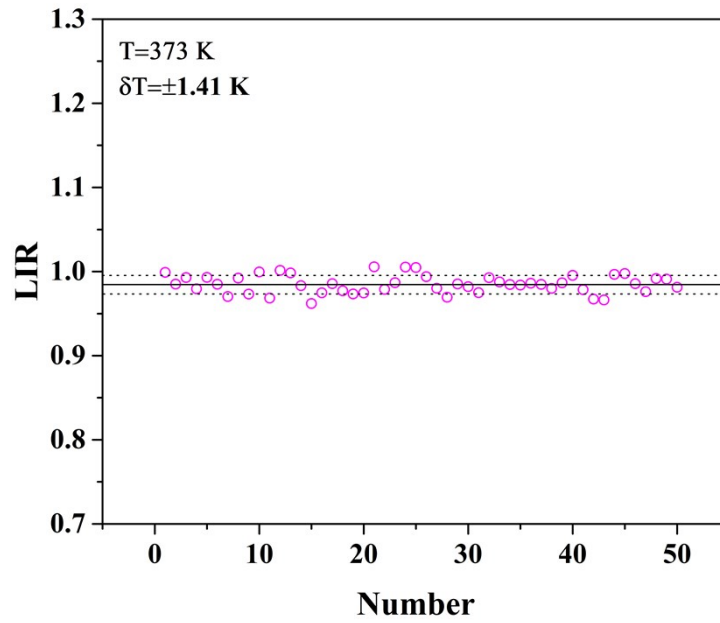

Fig. S9. Temperature uncertainty  $\delta T$  (50 measurements at 373 K) based on thermally coupled thermometry under the excitation of 980 nm.

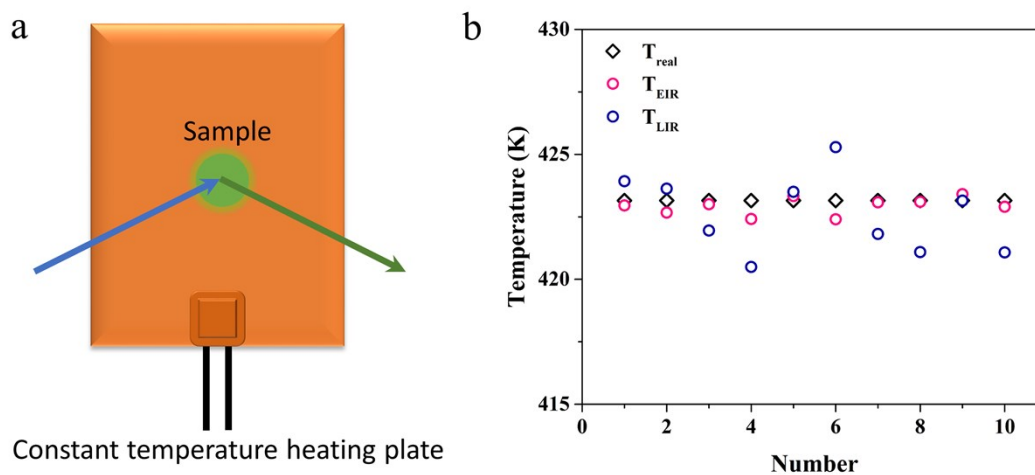

Fig. S10. (a) Scheme of temperature detection using a constant temperature heating plate. The sample is coated on the plate. (b) Temperature measurements based on the proposed *EIR* thermometry and typical *LIR* thermometry based on TCLs.



Table S1. Fitting parameters of the calibration curve based on the proposed *EIR* thermometry.

| Parameter | Value                 | $r^2$  |
|-----------|-----------------------|--------|
| a         | $-0.6804 \pm 0.1099$  |        |
| b         | $0.0598 \pm 0.0169$   | 0.9992 |
| c         | $143.9456 \pm 9.1418$ |        |

Table S2. Comparison of the thermometric performance of proposed *EIR* thermometry and typical *LIR* thermometry based on TCLs of  $\text{Er}^{3+}$ .

| Thermometry | Maximum $S_r$ (%) | R (%)            | $\delta T$ (K) |
|-------------|-------------------|------------------|----------------|
| EIR         | 4.7 (373 K)       | 98.2 (393–473 K) | 0.15 (373 K)   |
| LIR         | 0.8 (373 K)       | 98.8 (393–473 K) | 1.41 (373 K)   |
